# Supplementary material for: Integrating spin-crossover nanoparticles with silver nanowires: toward magnetic and conductive bifunctional nanomaterials
Source: Royal Society of Chemistry journal article supplement (doi:10.1039/c7nj02089a), 2017-01-01
Supplement: c7nj02089a1.pdf [file c7nj02089a1.pdf]

*Supporting Information*

**Integrating spin-crossover nanoparticles with silver nanowires:  
toward magnetic and conductive bifunctional nanomaterials**

*Zhi-Hua Li,<sup>a</sup> Yu-Xia Wang,<sup>a</sup> Wang-Kang Han,<sup>a</sup> Wei Zhu,<sup>a</sup> Tao Li,<sup>a</sup> Zaijun Li,<sup>a</sup> Xuehong Ren,<sup>b</sup> and Zhi-Guo Gu<sup>\*a</sup>*

*<sup>a</sup> Key Laboratory of Synthetic and Biological Colloids,, Ministry of Education, School of Chemical and Material Engineering, Jiangnan University, Wuxi 214122, P.R. China*

*<sup>b</sup> The Key Laboratory of Eco-textiles of Ministry of Education, College of Textiles and Clothing, Jiangnan University, Wuxi 214122, P.R. China*

*E-mail: [zhiguogu@jiangnan.edu.cn](mailto:zhiguogu@jiangnan.edu.cn)*

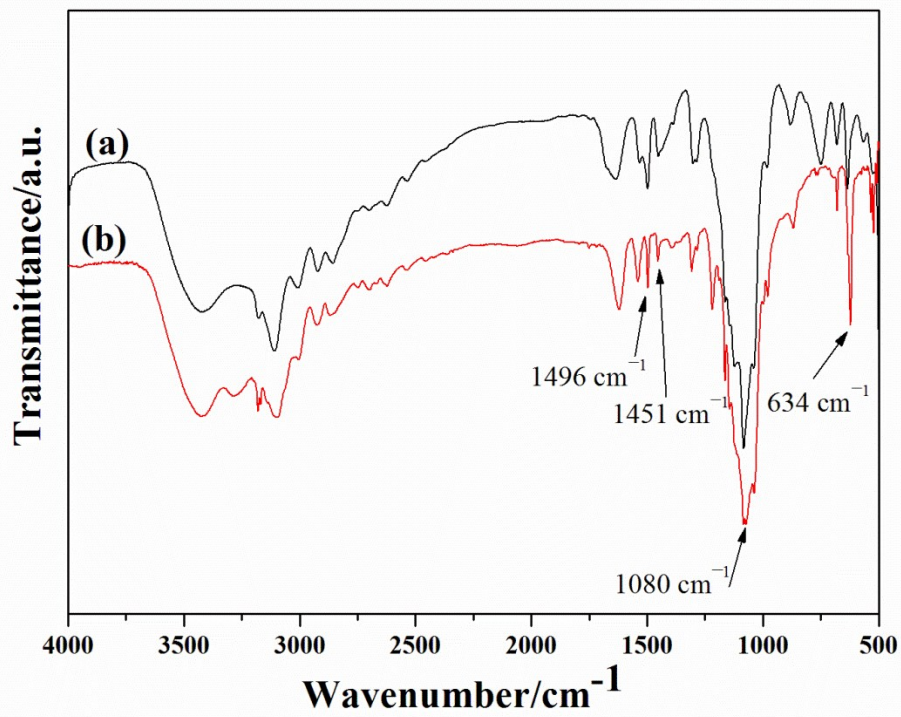

Fig. S1 FT-IR spectra of AgNWs@SCO-1 (a) and SCO-1 (b).

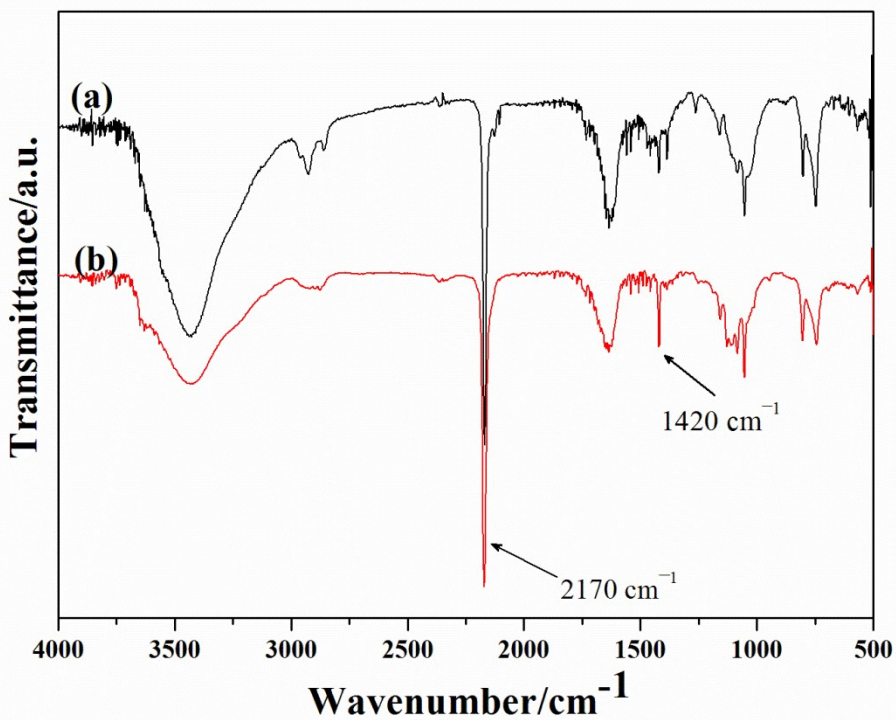

Fig. S2 FT-IR spectra of AgNWs@SCO-2 (a) and SCO-2 (b).

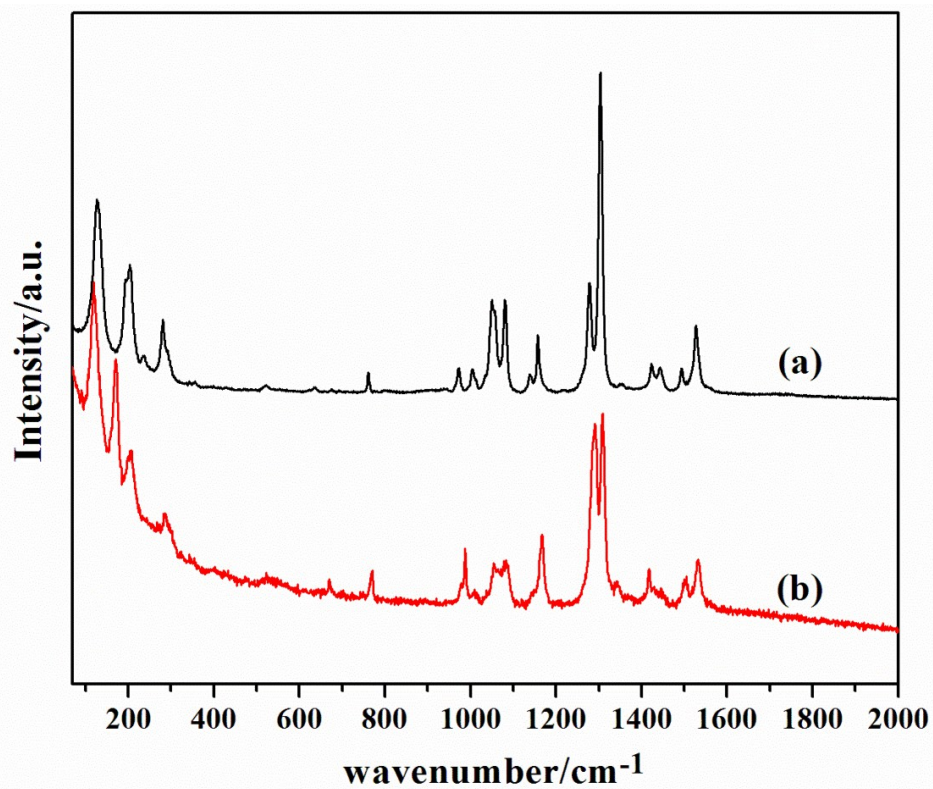

Fig. S3 Raman spectra of SCO-1 (a) and AgNWs@SCO-1 (b).

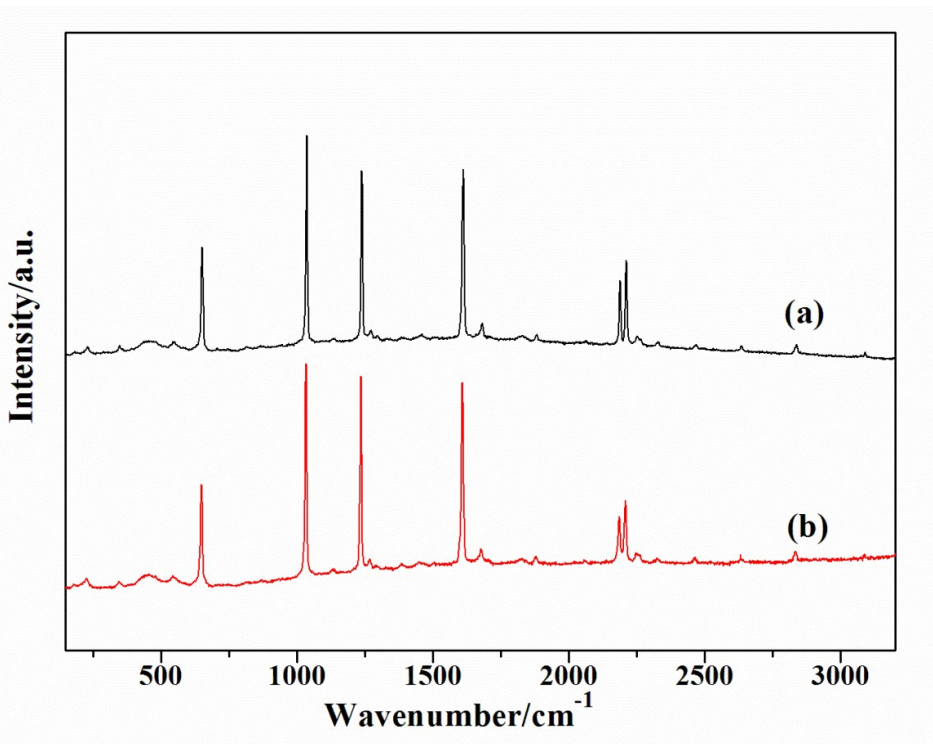

Fig. S4 Raman spectra of SCO-2 (a) and AgNWs@SCO-2 (b).

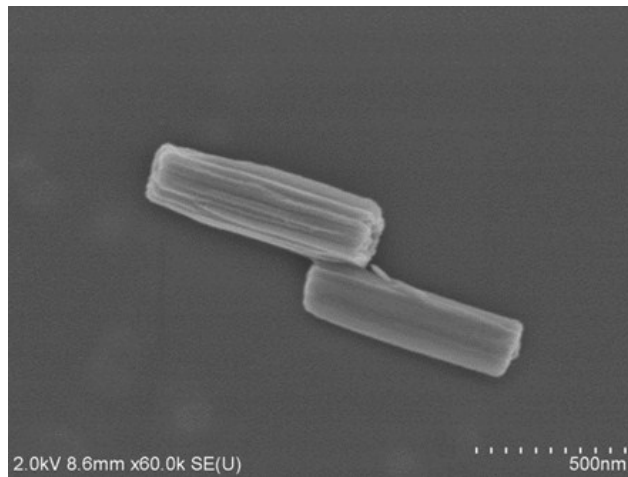

**Fig. S5** SEM image of individual SCO-1 with the size of *ca.* 600 nm × 150 nm.

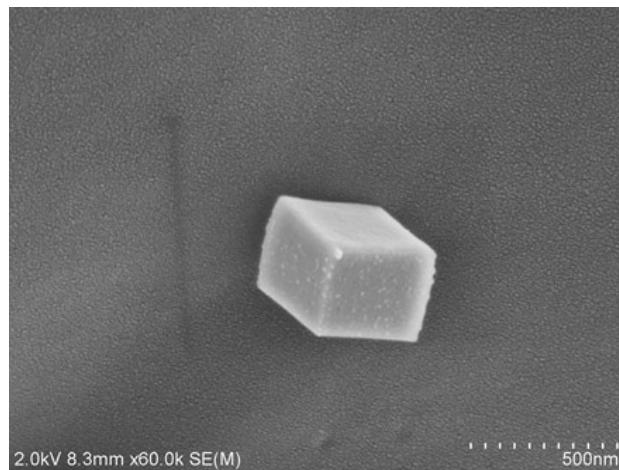

**Fig. S6** SEM image of individual SCO-2 with the size of *ca.* 350 nm × 350 nm × 200 nm.
